# Supplementary material for: Gating effect of g-C3N4-encapsulated Pt-based catalysts for the hydrogenation and Bamberger rearrangement of nitroaromatics
Source: Royal Society of Chemistry journal article supplement (doi:10.1039/d4ta07194h), 2024-01-01
Supplement: d4ta07194h1.pdf [file d4ta07194h1.pdf]

## Supporting Information

### **“Gating Effect” of g-C<sub>3</sub>N<sub>4</sub> Encapsulated Pt-based Catalysts for Hydrogenation and Bamberger Rearrangement of Nitroaromatics**

*Chong Yao, Jinjin Shan, Jie Liu, Jie Luo, Limei Pan, Jinghui Lyu, Feng Feng, Lili Lin, Chun-shan Lu, Ying Zheng, JianGuo Wang, Qingtao Wang\*, Qunfeng Zhang\*, Xiaonian Li\**

*C. Yao, J. J. Shan, J. Liu, J. Luo, L. M. Pan, J. H. Lyu, F. Feng, L. L. Lin, C. S. Lu, J. G. Wang, Q. T. Wang, Q. F. Zhang, X. N. Li*

*State Key Laboratory Breeding Base of Green Chemistry Synthesis Technology, College of Chemical Engineering, Zhejiang University of Technology, Hangzhou 310014, China.*

*E-mail: qtwang@zjut.edu.cn, zhangqf@zjut.edu.cn, xnli@zjut.edu.cn*

*Y. Zheng*

*Department of Chemical and Biochemical Engineering, Western University, London, ON, N6A 5B9, Canada*

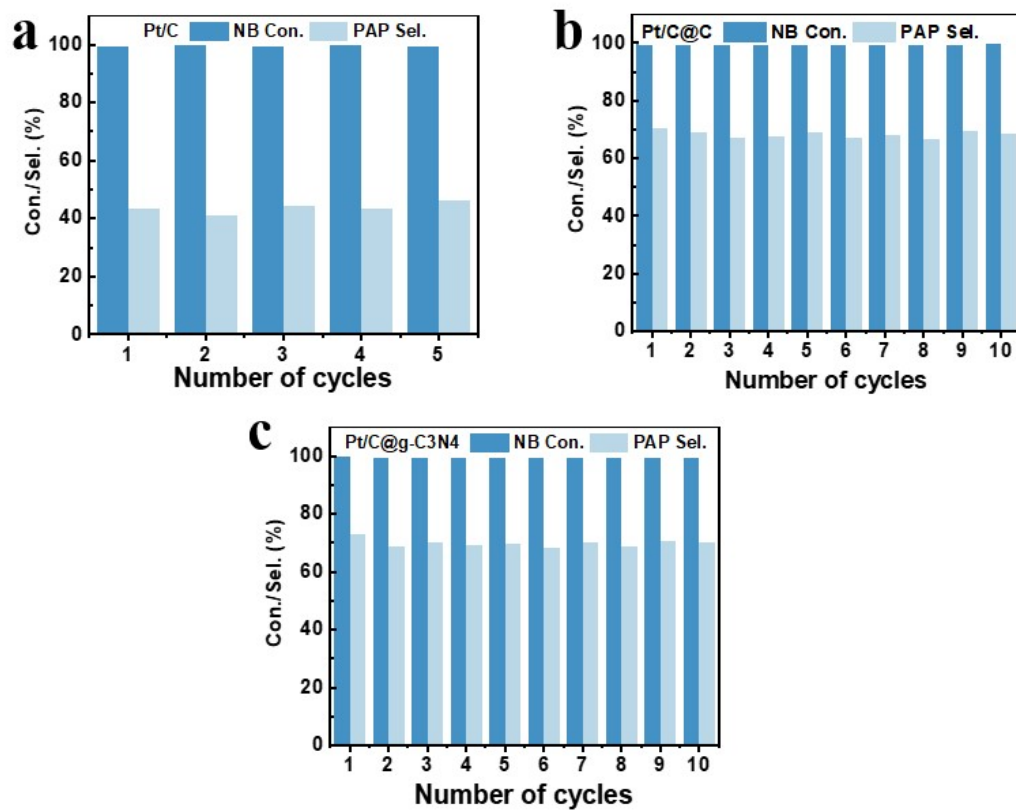

Fig. S1 Catalyst performance and stability testing of a) Pt/C, b) Pt/C@C and c) Pt/C@g-C<sub>3</sub>N<sub>4</sub>.

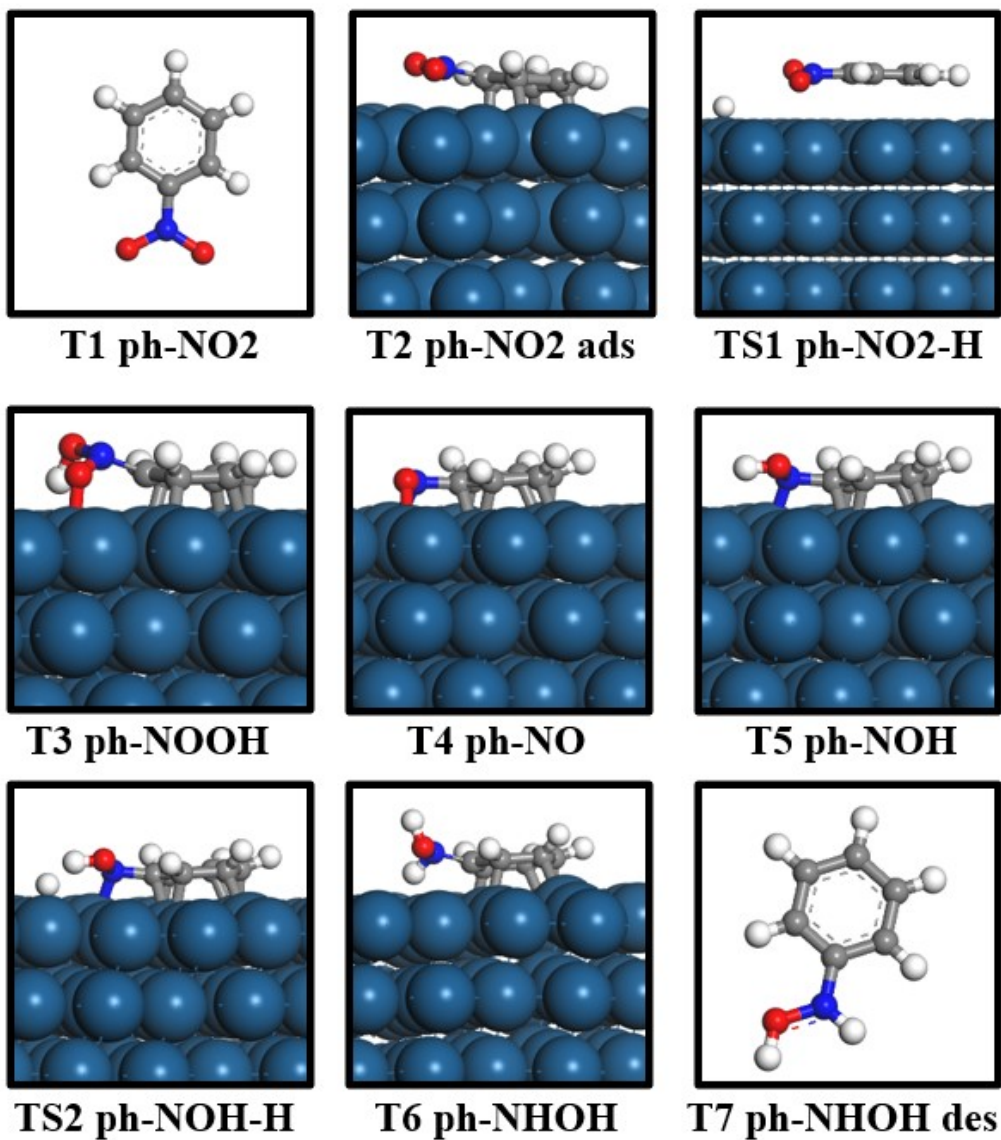

Fig. S2 The elemental reaction steps of intermediates on the Pt/C surface. T1: ph-NO<sub>2</sub>, T2: ph-NO<sub>2</sub> adsorption, TS1: ph-NO<sub>2</sub>-H, T3: ph-NOOH, T4: ph-NO, T5: ph-NOH, TS2: ph-NOH-H, T6: ph-NHOH, T7: ph-NHOH desorption.

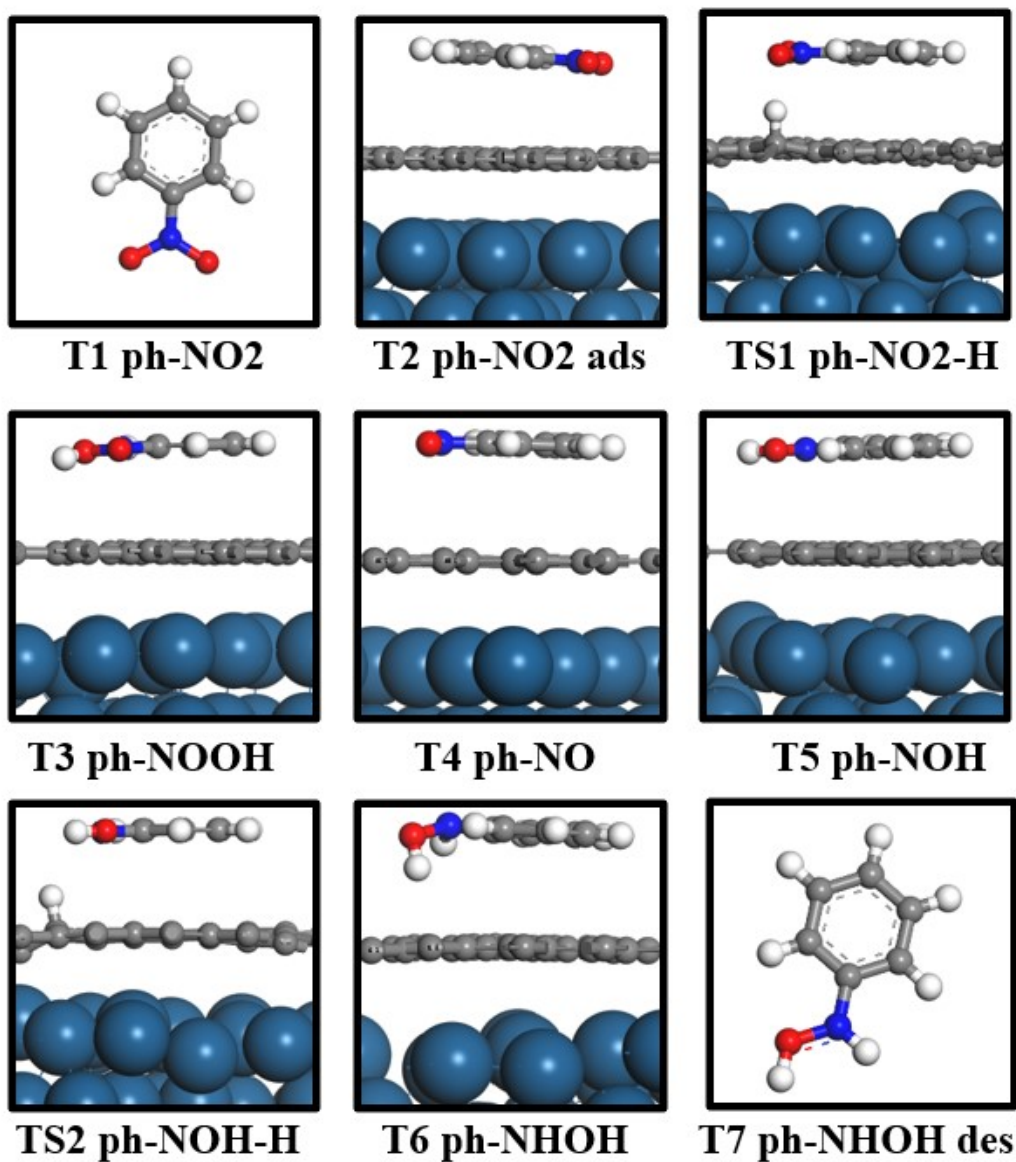

Fig. S3 The elemental reaction steps of intermediates on the Pt/C@C surface. T1: ph-NO<sub>2</sub>, T2: ph-NO<sub>2</sub> adsorption, TS1: ph-NO<sub>2</sub>-H, T3: ph-NOOH, T4: ph-NO, T5: ph-NOH, TS2: ph-NOH-H, T6: ph-NHOH, T7: ph-NHOH desorption.

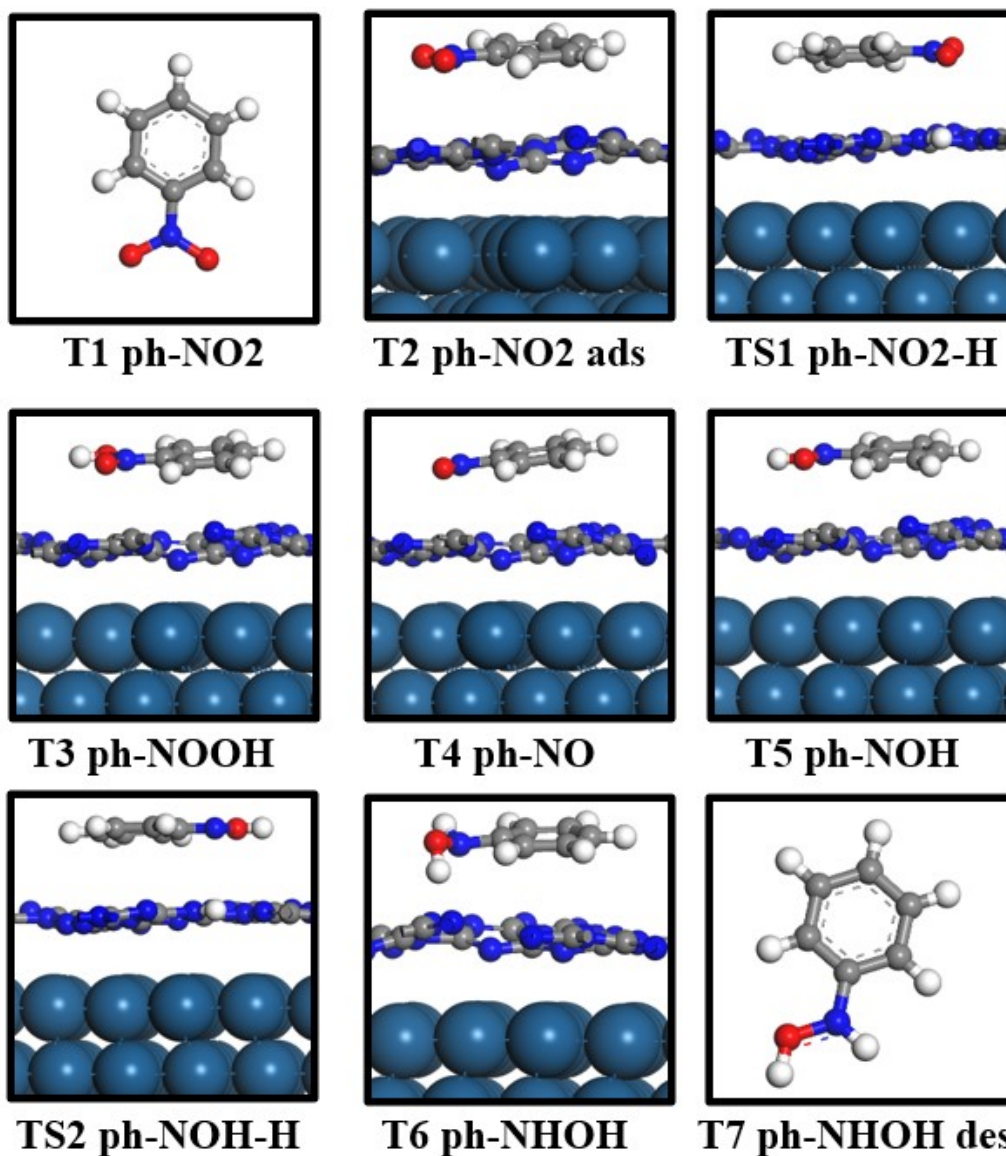

Fig. S4 The elemental reaction steps of intermediates on the Pt/C@g-C<sub>3</sub>N<sub>4</sub> surface. T1: ph-NO<sub>2</sub>, T2: ph-NO<sub>2</sub> adsorption, TS1: ph-NO<sub>2</sub>-H, T3: ph-NOOH, T4: ph-NO, T5: ph-NOH, TS2: ph-NOH-H, T6: ph-NHOH, T7: ph-NHOH desorption.

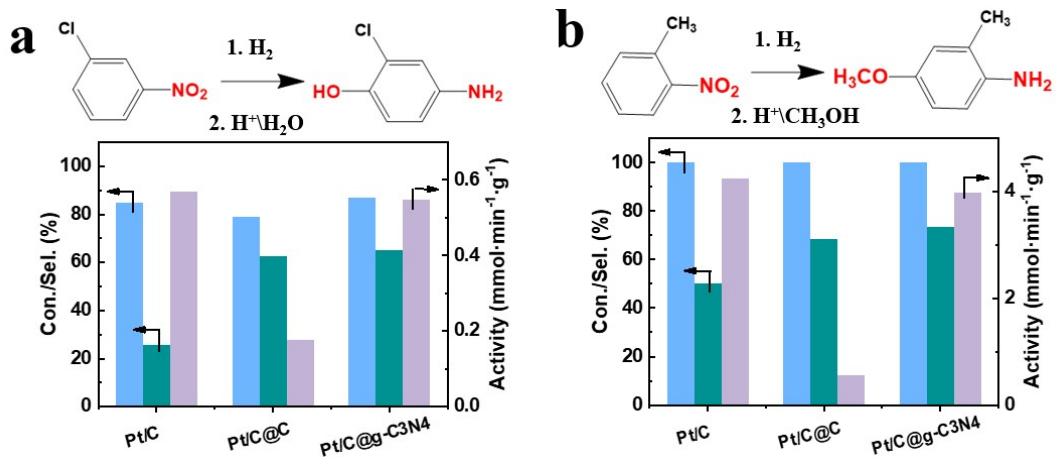

Fig. S5 Nitroaromatics hydrogenation-Bamberger rearrangements of a) 1-chloro-3-nitrobenzene and  $H_2O$ , b) 2-nitrotoluene and  $CH_3OH$ .

**Pt/C@C**

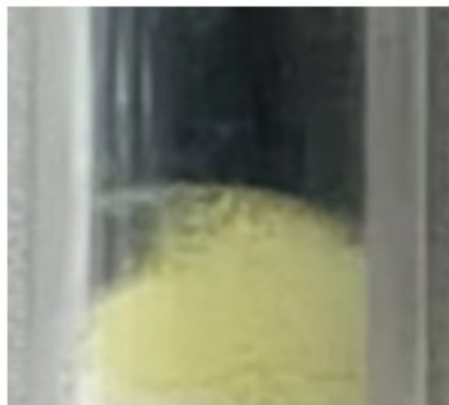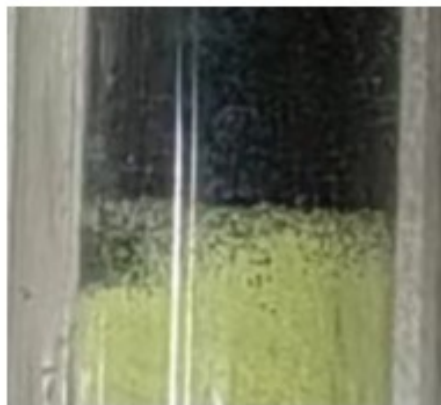

**Pt/C**

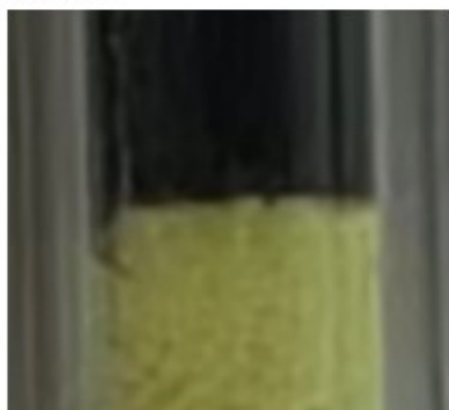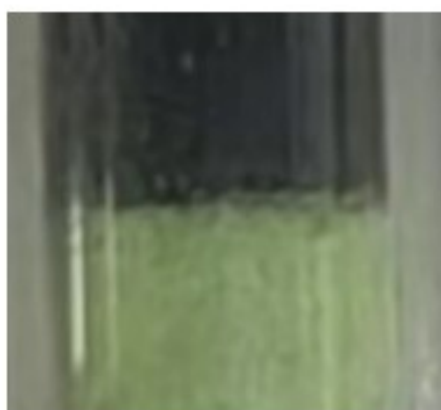

Fig. S6 Experiment on color change of  $\text{WO}_3$  upon hydrogen spillover reduction.

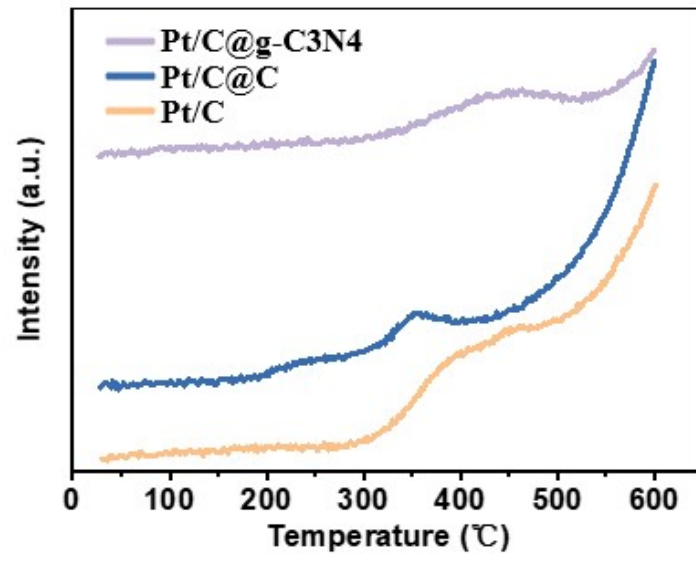

Fig. S7 H<sub>2</sub>-TPD-MS results of Pt/C, Pt/C@C, and Pt/C@g-C<sub>3</sub>N<sub>4</sub>.



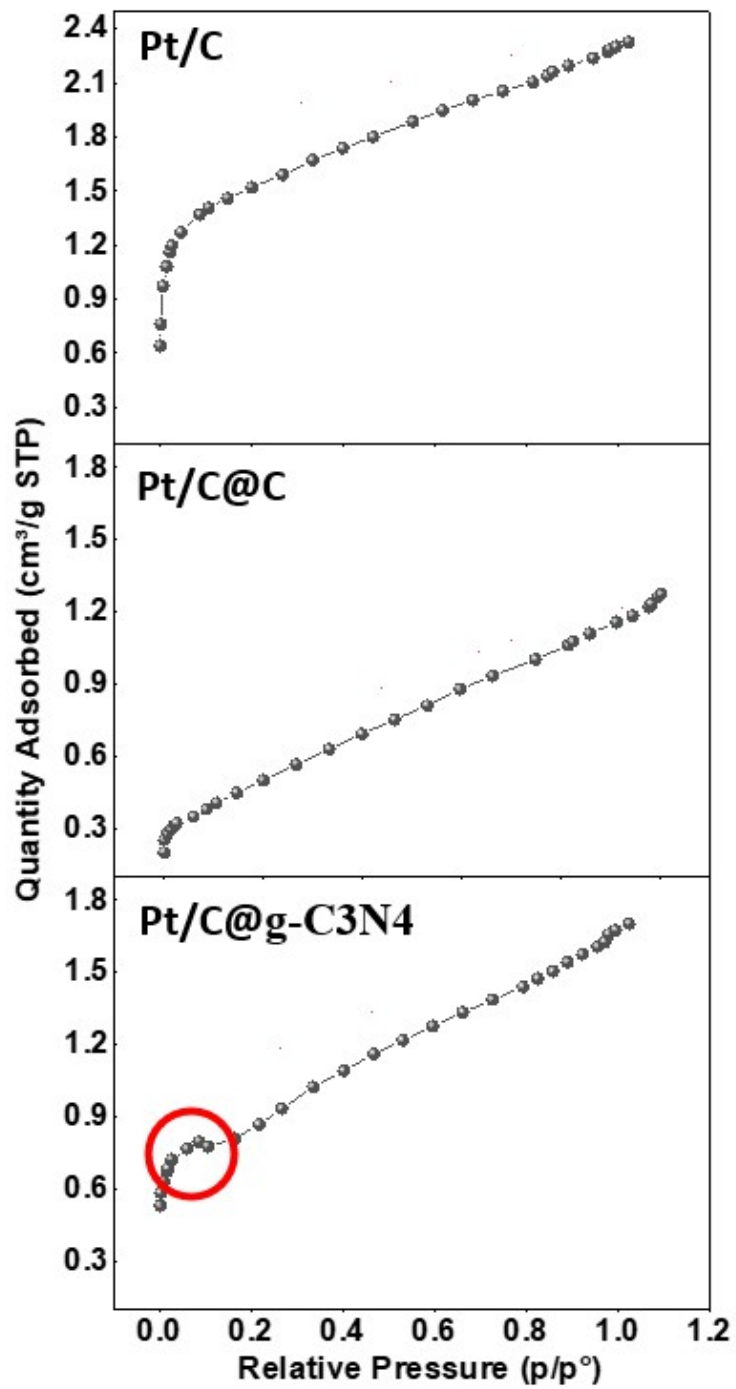

Fig. S8 BET results of H<sub>2</sub> adsorption curves for Pt/C, Pt/C@C, and Pt/C@g-C<sub>3</sub>N<sub>4</sub>.

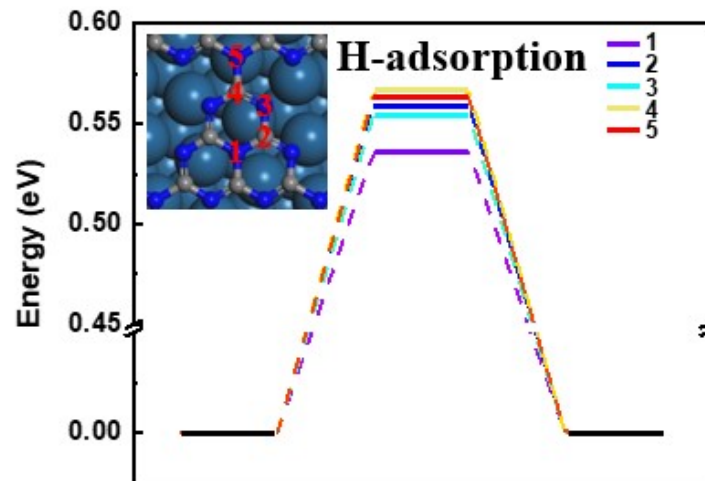

Fig. S9 The H<sub>2</sub> dissociation energy of different adsorption sites on the Pt/C@g-C<sub>3</sub>N<sub>4</sub> surface g-C<sub>3</sub>N<sub>4</sub>.

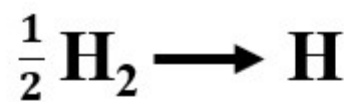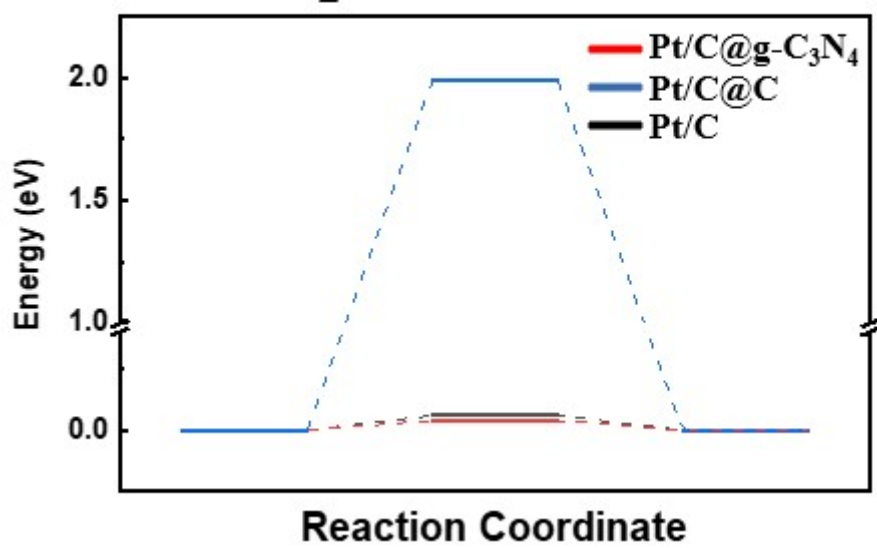

Fig. S10 The H<sub>2</sub> dissociation energy of Pt/C, Pt/C@C, and Pt/C@g-C<sub>3</sub>N<sub>4</sub>.

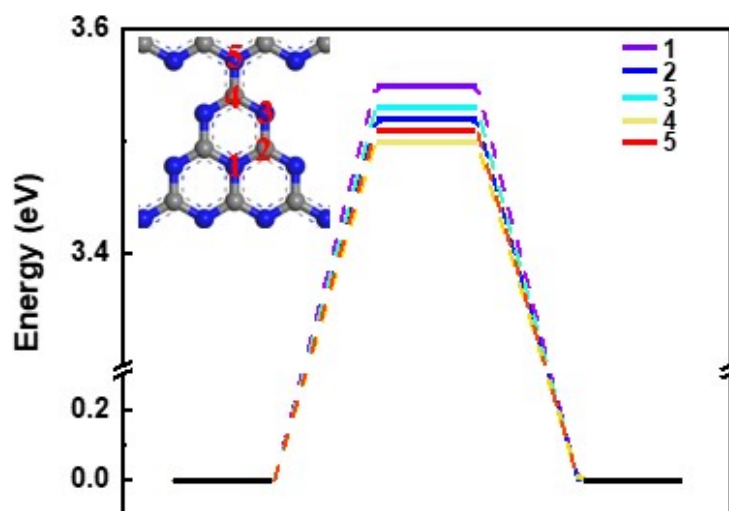

Fig. S11 The H<sub>2</sub> dissociation energy of different adsorption sites on the pure g-C<sub>3</sub>N<sub>4</sub> surfaces.
